# Supplementary material for: Clozapine: An Updated Overview of Pharmacogenetic Biomarkers, Risks, and Safety—Particularities in the Context of COVID-19
Source: Brain Sci. 2020 Nov 11;10(11):840. doi: 10.3390/brainsci10110840 (PMC7697202; doi:10.3390/brainsci10110840)
Supplement: Supplementary file 1 [file brainsci-10-00840-s001.zip]

Archive with 4 entries (4 files):
- Figure 1 CLZ.pdf
- Figure no. 2 PRISMA diagram .pdf
- Table 1 CLZ database search results.pdf
- Table 2 CLZ Pharmacogenetic markers.pdf
