# Supplementary material for: Clozapine: An Updated Overview of Pharmacogenetic Biomarkers, Risks, and Safety—Particularities in the Context of COVID-19
Source: Brain Sci. 2020 Nov 11;10(11):840. doi: 10.3390/brainsci10110840 (PMC7697202; doi:10.3390/brainsci10110840)
Supplement: Supplementary file 1 [file brainsci-10-00840-s001.zip › Table 1 CLZ database search results.pdf]

Table 1. Databases search results by numbers

| Main keyword | Secondary Keyword                         | PubMed® (n*) |           | Web of Science®(n*) |            |
|--------------|-------------------------------------------|--------------|-----------|---------------------|------------|
|              |                                           | 10 years     | Refined   | 10 years            | Refined    |
| clozapine    | Treatment resistant schizophrenia         | 60           | 19        | 148                 | 69         |
| clozapine    | Resistance                                | 4            | 3         | 21                  | 5          |
| clozapine    | Bipolar disorders                         | 4            | 3         | 38                  | 19         |
| clozapine    | Treatment resistant bipolar disorder      | 2            | 2         | 7                   | 5          |
| clozapine    | Side effects                              | 6            | 6         | 21                  | 8          |
| clozapine    | Agranulocytosis                           | 12           | 12        | 68                  | 33/        |
| clozapine    | Obesity or metabolic                      | 3+14         | 3+14      | 12/193              | 10/53      |
| clozapine    | Pharmacogenetic                           | 5            | 4         | 6                   | 6          |
| clozapine    | Pulmonary embolism                        | 3            | 3         | 7                   | 4          |
| clozapine    | Seizure                                   | 8            | 6         | 23                  | 11         |
| clozapine    | COVID 19                                  | 10           | 9         | 5                   | 3          |
| clozapine    | Pregnancy                                 | 2            | 2         | 7                   | 4          |
| clozapine    | Early-onset/childhood-onset schizophrenia | 3            | 3         | 12                  | 6          |
| clozapine    | Romania                                   | 5            | 3         | 3                   | 3          |
|              | <b>Total</b>                              | <b>141</b>   | <b>92</b> | <b>571</b>          | <b>239</b> |

\*n-number of search results
